# Supplementary material
Source: PubMed Central journal article supplement (PMC2795536)
Supplement: 0808378106_ST1_PDF.pdf [file 0808378106_ST1_PDF.pdf]

**Table S1. List of odorants used in the functional analysis of OR7D4 and OR7D1 orthologs**

**A. List of sex-steroid derived odorants used**

| IUPAC name                                         | Common name                 | Structure |
|----------------------------------------------------|-----------------------------|-----------|
| 5- $\alpha$ -Androst-16-en-3-one                   | androstenone                |           |
| Androsta-4,16-dien-3-one                           | androstadienone             |           |
| 5- $\alpha$ -Androst-16-en-3- $\alpha$ -ol         | androstenol                 |           |
| 5- $\alpha$ -Androst-16-en-3- $\beta$ -ol          | 3- <i>epi</i> -androstenol  |           |
| 5- $\alpha$ -Androst-16-en-3-methyl ketal          | androstenone methyl ketal   |           |
| 3- $\alpha$ -Hydroxy-5- $\alpha$ -androstan-17-one | androsterone                |           |
| 3- $\beta$ -Hydroxy-5- $\alpha$ -androstan-17-one  | 3- <i>epi</i> -androsterone |           |
| 3- $\beta$ -Hydroxyandrost-5-en-17-one             | DHEA                        |           |
| Estra-1,3,5(10),16-tetraen-3-ol                    | estratetraenol              |           |
| 17- $\beta$ -Estradiol                             | estradiol                   |           |

## B. List of 10 mixtures of 169 odorants used in a screen for OR7D1 ligands

| <b>Mixture</b>  | <b>Odorant</b>               |
|-----------------|------------------------------|
| <b>1</b>        | (+)-Carvone                  |
|                 | (-)-Carvone                  |
|                 | Citral                       |
|                 | (1R)-(-)-Fenchone            |
|                 | (+)-Fenchone                 |
|                 | (-)-Rose oxide               |
|                 | (+)-Rose oxide               |
|                 | D-Carvone                    |
|                 | (-)-Camphor                  |
|                 | (S)-(-)-Limonene             |
|                 | (R)-(+)-1-Phenylethanol      |
|                 | (S)-(+)-2-Phenylbutyric acid |
|                 | (R)-(-)-2-Phenylbutyric acid |
|                 | 2-Hexanone                   |
|                 | 1-Pentanol                   |
|                 | (±)-2-Butanol                |
|                 | 1-Propanol                   |
| <b>2</b>        | 1-Hexanol                    |
|                 | (-)-Menthol                  |
|                 | (R)-(-)-2-Heptanol           |
|                 | (+)-Menthol                  |
|                 | 2-Methyl-2-heptanol          |
|                 | (S)-(+)-2-Octanol            |
|                 | (S)-(+)-2-Heptanol           |
|                 | 1-Decanol                    |
|                 | (-)-beta-Citronellol         |
|                 | (S)-(-)-1-Phenylethanol      |
|                 | (R)-(-)-2-Butanol            |
|                 | Propanal                     |
|                 | Undecanal                    |
|                 | Octanal                      |
|                 | trans-Cinnamaldehyde         |
|                 | Nonanal                      |
| <b>3</b>        | Heptaldehyde                 |
|                 | Decanal                      |
|                 | Hexanoic acid                |
|                 | Heptanoic acid               |
|                 | Valeric acid                 |
|                 | Propionic acid               |
|                 | Butyric acid                 |
|                 | Nonanoic acid                |
|                 | Methyl propionate            |
|                 | Ethyl butyrate               |
|                 | Butyl butyrate               |
|                 | tert-Butyl propionate        |
|                 | Methyl butyrate              |
| Propyl butyrate |                              |

|          |                                   |
|----------|-----------------------------------|
|          | Pentyl acetate                    |
|          | Isobutylamine                     |
|          | Geraniol                          |
|          | 2-Pentanone                       |
|          | 2-Butanone                        |
| <b>4</b> | (1S)-(-)-alpha-Pinene             |
|          | 1,4-Cineole                       |
|          | Phenetole                         |
|          | (R)-(+)-Pulegone                  |
|          | Benzyl alcohol                    |
|          | Guaiacol                          |
|          | Isopentylamine                    |
|          | g-Caprolactone                    |
|          | Allyl heptanoate                  |
|          | a-Amylcinnamaldehyde              |
|          | Amyl hexanoate                    |
|          | Amylbutyrate                      |
|          | Anethole                          |
|          | Anisaldehyde                      |
|          | Benzophenone                      |
| <b>5</b> | Benzyl acetate                    |
|          | Benzyl salicylate                 |
|          | Butyl heptanoate                  |
|          | (+)-Camphor                       |
|          | Cedryl acetate                    |
|          | Cinnamyl alcohol                  |
|          | Cinnamaldehyde                    |
|          | (R)-(+)-Citronellal               |
|          | (S)-(-)-Citronellal               |
|          | Citronellol                       |
|          | Coumarin                          |
|          | Cyclohexanone                     |
|          | p-Cymene                          |
|          | 5,5-Dimethyl-1,3-cyclohexanedione |
|          | 3-Octanone                        |
|          | Eucalyptol                        |
|          | Heptyl isobutyrate                |
|          | Hexyl acetate                     |
|          | a-Hexylcinnamaldehyde             |
| <b>6</b> | Isobornyl acetate                 |
|          | Linalool                          |
|          | Lyral                             |
|          | Hydroxycitronellal                |
|          | p-Tolyl isobutyrate               |
|          | o-Tolyl isobutyrate               |
|          | p-Tolyl phenylacetate             |
|          | 2-Methoxy-3-Methyl-pyrazine       |
|          | 2-Methoxypyrazine                 |
|          | Methyl salicylate                 |
|          | Myrcene                           |

w-Pentadecalactone  
Prenylacetate  
2-Phenylethanol  
2-Phenethyl acetate  
Piperonal  
Pyrazine  
Thymol  
Triethylamine

---

**7** 2-Heptanone  
Methyl eugenol  
Eugenol  
Eugenol methyl ether  
Butanal  
Hexanal  
1-Hexanol  
1-Pentanol  
Pentanal  
Nonanedioic acid  
Isovaleric acid  
Heptanoic acid  
Decanoic acid  
Valeric acid  
Vanillic acid  
Hexanoic acid  
Octanoic Acid

---

**8** 1-Octanol  
4-Ethylphenol  
1-Heptanol  
Heptaldehyde  
1-Decanol  
1-Nonanol  
Decanal  
Nonanal  
Ethyl vanillin  
Vanillin  
Acetophenone  
2-Ethylphenol  
Guaiacol  
Allylbenzene  
Octanal  
2-Bromophenol  
Benzaldehyde  
Piperonyl alcohol  
Piperonyl acetate  
4-Hydroxycoumarin

---

**9** 4-Chromanone  
2-Coumaranone  
Tetrahydrofuran  
Tetrahydropyran  
Benzaldehyde dimethyl acetal

(1S)-(-)-alpha-Pinene  
Allyl phenylacetate  
Dicyclohexyl disulfide  
2-,3-,10-Mercaptopinane  
1,4-Cineole  
Butyl butyryllactate  
1,3-Butanedithiol  
Cyclopentanethiol  
2-Acetyl-3,5(6)-dimethylpyrazine  
2,2'-(Dithiodimethylene)difuran  
Thioglycolic acid

---

**10** d-Valerolactone  
2-Furyl methyl ketone  
Acetal  
Tetrahydrofurfuryl acetate  
2,3-Diethyl-5-methylpyrazine  
Butyl formate  
Pyridine  
Pyrrole  
Piperidine  
2-Methyl-1-propanethiol  
Ethyl salicylate  
Ethyl pyruvate

---

---
