# Supplementary material
Source: PubMed Central journal article supplement (PMC2795536)
Supplement: 0808378106_ST2_PDF.pdf [file 0808378106_ST2_PDF.pdf]

**Table S2. Pairwise comparisons of the dosage response curves for androstenone with an F test**

**A. Pairwise comparisons between the hypothetical hominine ancestor and each synthetic mutant representing changes from the ancestor to various hominine species**

|          | <b>EC50</b> | <b>F (DFn, DFd)</b> | <b>P value</b> | <b>Function</b> |
|----------|-------------|---------------------|----------------|-----------------|
| hominine | 0.69        |                     |                |                 |
| L17F     | 0.98        | 2.346 (1,12)        | > 0.05         | n               |
| V26I     | 1.2         | 4.648 (1,12)        | > 0.05         | n               |
| N84S     | 3.5         | 47.18 (1,12)        | < 0.01**       | d               |
| S89I     | 1.7         | 20.94 (1,12)        | < 0.01**       | d               |
| I160V    | 0.25        | 11.64 (1,12)        | > 0.05         | n               |
| G171V    | 0.15        | 29.48 (1,12)        | < 0.01**       | i               |
| R227G    | 3.7         | 51.33 (1,12)        | < 0.01**       | d               |
| M228T    | 6.6         | 120.9 (1,12)        | < 0.01**       | d               |
| E232K    | 0.30        | 6.504 (1,12)        | > 0.05         | n               |
| M273T    | 1.7         | 24.09 (1,12)        | < 0.01**       | d               |

**B. Pairwise comparison between the hypothetical Great Ape ancestor and each synthetic mutant representing changes from the ancestor to the hominine ancestor and to orangutan**

|           | <b>EC50</b> | <b>F (DFn, DFd)</b> | <b>P value</b> | <b>Function</b> |
|-----------|-------------|---------------------|----------------|-----------------|
| Great Ape | 0.23        |                     |                |                 |
| P58A      | 3.7         | 522.8 (1,12)        | < 0.01**       | d               |
| M110L     | 0.58        | 116.2 (1,12)        | < 0.01**       | d               |
| H128Y     | 0.22        | 0.04442 (1,12)      | > 0.05         | n               |
| H131Q     | 0.30        | 12.19 (1,12)        | > 0.05         | n               |
| I151V     | 0.23        | 0.01668 (1,12)      | > 0.05         | n               |
| C179Y     | >30         | 31.19 (1,12)        | < 0.01**       | d               |
| E180V     | >30         | N/A                 | N/A            | d               |
| Q183R     | 2.1         | 451.3 (1,12)        | < 0.01**       | d               |
| R189C     | 1.4         | 411.8 (1,12)        | < 0.01**       | d               |
| Q220R     | 0.058       | 60.10 (1,12)        | < 0.01**       | i               |
| T231P     | 0.22        | 0.2505 (1,12)       | > 0.05         | n               |
| Y252N     | >30         | 10.13 (1,12)        | > 0.05         | d               |
| H266R     | 0.33        | 50.17 (1,12)        | < 0.01**       | d               |
| M273T     | 0.38        | 48.19 (1,12)        | < 0.01**       | d               |

**C. Pairwise comparison between the hypothetical catarrhine ancestor and each synthetic mutant representing changes from the ancestor to the Great Ape ancestor and to various Old World Monkey species**

|            | <b>EC50</b> | <b>F (DFn, DFd)</b> | <b>P value</b> | <b>Function</b> |
|------------|-------------|---------------------|----------------|-----------------|
| catarrhine | 0.026       |                     |                |                 |
| L6Y        | 7.5E-05     | 23.27 (1,20)        | < 0.01**       | i               |

|       |         |               |          |   |
|-------|---------|---------------|----------|---|
| E11K  | 7.8E-04 | 9.192 (1,20)  | > 0.05   | n |
| D19G  | 1.7E-04 | 16.54 (1,20)  | 0.025*   | i |
| D20A  | 4.3E-07 | 49.00 (1,20)  | < 0.01** | i |
| P21S  | 1.9E-04 | 15.44 (1,20)  | 0.033*   | i |
| P21_  | 0.052   | 1.243 (1,20)  | > 0.05   | n |
| E22Q  | 8.1E-07 | 48.54 (1,20)  | < 0.01** | i |
| R88Q  | 0.52    | 55.77 (1,20)  | < 0.01** | d |
| D91H  | 9.9E-04 | 9.944 (1,20)  | > 0.05   | n |
| M95V  | 2.6E-04 | 14.16 (1,20)  | 0.049*   | i |
| G96R  | 0.088   | 5.190 (1,20)  | > 0.05   | n |
| G96W  | 0.18    | 14.45 (1,20)  | 0.045*   | d |
| M110T | 0.18    | 15.04 (1,20)  | 0.037*   | d |
| N112T | 3.0E-07 | 60.74 (1,20)  | < 0.01** | i |
| A116T | 0.033   | 0.1086 (1,20) | > 0.05   | n |
| A116V | 6.5E-04 | 9.007 (1,20)  | > 0.05   | n |
| R122W | >30     | N/A           | N/A      | d |
| C139H | 1.3E-06 | 57.84 (1,20)  | < 0.01** | i |
| L143R | 2.6E-05 | 31.13 (1,20)  | < 0.01** | i |
| F153V | 0.013   | 0.7381 (1,20) | > 0.05   | n |
| V155F | 3.0E-05 | 33.65 (1,20)  | < 0.01** | i |
| I160L | 4.0     | 112.8 (1,20)  | < 0.01** | d |
| T167A | 0.0043  | 4.272 (1,20)  | > 0.05   | n |
| T170I | 0.019   | 0.1725 (1,20) | > 0.05   | n |
| L181V | 0.10    | 12.01 (1,20)  | > 0.05   | n |
| L181P | 0.081   | 9.083 (1,20)  | > 0.05   | n |
| D191N | 0.035   | 0.2046 (1,20) | > 0.05   | n |
| L194_ | 2.7     | 132.3 (1,20)  | < 0.01** | d |
| V198I | 0.010   | 1.507 (1,20)  | > 0.05   | n |
| V211A | 0.042   | 0.6602 (1,20) | > 0.05   | n |
| F216I | 0.13    | 14.54 (1,20)  | 0.045*   | d |
| S219F | 1.0E-04 | 30.61 (1,20)  | < 0.01** | i |
| V222I | 1.6E-05 | 61.17 (1,20)  | < 0.01** | i |
| K236E | 4.2     | 118.2 (1,20)  | < 0.01** | d |
| T279A | 0.0042  | 4.546 (1,20)  | > 0.05   | n |
| K295N | 0.21    | 28.22 (1,20)  | < 0.01** | d |
| G299A | >30     | N/A           | N/A      | d |
| L301P | 4.0     | 162.7 (1,20)  | < 0.01** | d |
| G302E | 0.10    | 10.81 (1,20)  | > 0.05   | n |
| A308T | 0.021   | 0.1144 (1,20) | > 0.05   | n |
| A309D | 0.063   | 3.281 (1,20)  | > 0.05   | n |

EC50 values for responses to androstenone are given in  $\mu\text{M}$ . An F test is used to compare the best-fit values of EC50 of the dosage response curves between each hypothetical ancestors and each synthetic mutant. (See Fig. S4 for the dosage response curves.) F value, DF<sub>n</sub>, DF<sub>d</sub>, and P value are shown for each synthetic mutant. A Bonferroni correction was applied to the F test. For A: Before correction: \* P < 0.005, \*\* P < 0.001, \*\*\* P < 0.0001. For B: Before correction: \* P < 0.0036, \*\* P < 0.00071, \*\*\* P < 0.000071. For C: Before correction: \* P < 0.0012, \*\* P < 0.00024, \*\*\* P < 0.000024. After correction: \* P < 0.05, \*\* P < 0.01. Asterisks shown represent

significance of P values after correction. Significant change in function is indicated as follows: i, increase in function; d, decrease in function; n, no change in function. DF<sub>n</sub>, numerator degrees of freedom. DF<sub>d</sub>, denominator degrees of freedom.
