# Supplementary material
Source: PubMed Central journal article supplement (PMC2795536)
Supplement: 0808378106_ST3_PDF.pdf [file 0808378106_ST3_PDF.pdf]

**Table S3. Pairwise comparisons of the dosage response curves for androstadienone between the hypothetical hominine ancestor and each synthetic mutant with an F test**

|          | <b>EC50</b> | <b>F (DFn, DFd)</b> | <b>P value</b> |
|----------|-------------|---------------------|----------------|
| hominine | 0.044       |                     |                |
| L17F     | 0.067       | 0.6002 (1,20)       | > 0.05         |
| V26I     | 0.19        | 6.253 (1,20)        | > 0.05         |
| N84S     | 1.1         | 70.50 (1,20)        | < 0.01**       |
| S89I     | 0.15        | 5.983 (1,20)        | > 0.05         |
| I160V    | 0.0075      | 19.29 (1,20)        | < 0.01**       |
| G171V    | 0.0081      | 20.74 (1,20)        | < 0.01**       |
| R227G    | 1.0         | 56.01 (1,20)        | < 0.01**       |
| M228T    | 1.4         | 66.71 (1,20)        | < 0.01**       |
| E232K    | 0.05        | 0.1379 (1,20)       | > 0.05         |
| M273T    | 0.55        | 60.77 (1,20)        | < 0.01**       |

EC50 values for responses to androstadienone are given in  $\mu\text{M}$ . An F test is used to compare the best-fit values of EC50 of the dosage response curves between the hypothetical hominine ancestor and each synthetic mutant. (See Fig. S5 for the dosage response curves.) F value, DF<sub>n</sub>, DF<sub>d</sub>, and P values are shown for the synthetic mutants. A Bonferroni correction was applied to the F test. Before correction: \* \* P < 0.005, \*\* P < 0.001, \*\*\* P < 0.0001. After correction: \* P < 0.05, \*\* P < 0.01. Asterisks shown represent significance of P values after correction. DF<sub>n</sub>, numerator degrees of freedom. DF<sub>d</sub>, denominator degrees of freedom.
