# Supplementary material
Source: PubMed Central journal article supplement (PMC2795536)
Supplement: 0808378106_ST4_PDF.pdf [file 0808378106_ST4_PDF.pdf]

**Table S4. Variable selection pressure on the *OR7D4* gene in various lineages**

**A. Log likelihood scores and  $\omega$  estimates for one-ratio, two-ratio, and three-ratio branch-specific models using the OR7D4+OR7D1 dataset with catarrhine OR7D4, human OR7D4, and/or Great Ape OR7D4 as the foreground branches**

| <b>Model</b>                                  | <b><i>l</i></b> | <b><math>\omega_0</math></b> | <b><math>\omega_{ga}</math></b> | <b><math>\omega_{hu}</math></b> | <b><math>\omega_c</math></b> |
|-----------------------------------------------|-----------------|------------------------------|---------------------------------|---------------------------------|------------------------------|
| M0                                            | -2861.29        | 0.4                          | N/A                             | N/A                             | N/A                          |
| Two-ratio Great Ape                           | -2856.99        | 0.3                          | $\infty$                        | N/A                             | N/A                          |
| Two-ratio fix $\omega_{ga} = 1$               | -2858.89        | 0.3                          | (1)                             | N/A                             | N/A                          |
| Two-ratio human                               | -2861.17        | 0.4                          | N/A                             | 0.6                             | N/A                          |
| Two-ratio fix $\omega_{hu} = 1$               | -2861.23        | 0.4                          | N/A                             | (1)                             | N/A                          |
| two-ratio catarrhine                          | -2861.25        | 0.4                          | N/A                             | N/A                             | 0.6                          |
| two-ratio fix $\omega_c = 1$                  | -2861.27        | 0.3                          | N/A                             | N/A                             | (1)                          |
| two-ratio Great Ape = human                   | -2858.23        | 0.3                          | 8.8                             | 8.8                             | N/A                          |
| two-ratio fix $\omega_{ga} = \omega_{hu} = 1$ | -2858.92        | 0.3                          | (1)                             | (1)                             | N/A                          |
| three-ratio Great Ape + human                 | -2856.92        | 0.3                          | $\infty$                        | 0.5                             | N/A                          |
| three-ratio fix $\omega_{ga} = 1$             | -2858.79        | 0.3                          | (1)                             | 0.5                             | N/A                          |
| three-ratio fix $\omega_{hu} = 1$             | -2857.10        | 0.3                          | $\infty$                        | (1)                             | N/A                          |
| two-ratio Great Ape = catarrhine              | -2857.21        | 0.3                          | $\infty$                        | N/A                             | $\infty$                     |
| two-ratio fix $\omega_{ga} = \omega_c = 1$    | -2858.91        | 0.3                          | (1)                             | N/A                             | (1)                          |
| three-ratio Great Ape + catarrhine            | -2856.99        | 0.3                          | $\infty$                        | N/A                             | 0.4                          |
| three-ratio fix $\omega_{ga} = 1$             | -2858.87        | 0.3                          | (1)                             | N/A                             | 0.5                          |
| three-ratio fix $\omega_c = 1$                | -2857.06        | 0.3                          | $\infty$                        | N/A                             | (1)                          |

## B. Likelihood ratio tests comparing the one-ratio, two-ratio, and three-ratio models in A

| LRT                                                                             | Null                                     | 2Δ <i>l</i> | Df | P value  |
|---------------------------------------------------------------------------------|------------------------------------------|-------------|----|----------|
| two-ratio Great Ape vs. M0                                                      | $\omega_{ga} = \omega_0$                 | 8.60        | 1  | 0.0034** |
| two-ratio Great Ape vs. two-ratio fix $\omega_{ga} = 1$                         | $\omega_{ga} \leq 1$                     | 3.79        | 1  | 0.0516   |
| two-ratio human vs. M0                                                          | $\omega_{hu} = \omega_0$                 | 0.26        | 1  | 0.6130   |
| two-ratio Great Ape = human vs. M0                                              | $(\omega_{ga} = \omega_{hu}) = \omega_0$ | 6.13        | 1  | 0.0133*  |
| three-ratio Great Ape + human vs. two-ratio Great Ape                           | $\omega_{hu} = \omega_0$                 | 0.14        | 1  | 0.7111   |
| three-ratio Great Ape + human vs. two-ratio human                               | $\omega_{ga} = \omega_0$                 | 8.48        | 1  | 0.0036** |
| two-ratio human vs. two-ratio fix $\omega_{hu} = 1$                             | $\omega_{hu} < 1$                        | 0.12        | 1  | 0.7272   |
| two-ratio Great Ape = human vs. two-ratio fix $\omega_{ga} = \omega_{hu} = 1$   | $(\omega_{ga} = \omega_{hu}) \leq 1$     | 1.37        | 1  | 0.2424   |
| three-ratio Great Ape + human vs. three-ratio fix $\omega_{ga} = 1$             | $\omega_{ga} \leq 1$                     | 3.74        | 1  | 0.0532   |
| three-ratio Great Ape + human vs. three-ratio fix $\omega_{hu} = 1$             | $\omega_{hu} \leq 1$                     | 0.35        | 1  | 0.5524   |
| two-ratio catarrhine vs. M0                                                     | $\omega_c = \omega_0$                    | 0.10        | 1  | 0.7529   |
| two-ratio Great Ape = catarrhine vs. M0                                         | $(\omega_{ga} = \omega_c) = \omega_0$    | 8.17        | 1  | 0.0043** |
| three-ratio Great Ape + catarrhine vs. two-ratio Great Ape                      | $\omega_c = \omega_0$                    | 0.01        | 1  | 0.9398   |
| three-ratio Great Ape + catarrhine vs. two-ratio catarrhine                     | $\omega_{ga} = \omega_0$                 | 8.51        | 1  | 0.0035** |
| two-ratio catarrhine vs. two-ratio fix $\omega_c = 1$                           | $\omega_c \leq 1$                        | 0.06        | 1  | 0.8126   |
| two-ratio Great Ape = catarrhine vs. two-ratio fix $\omega_{ga} = \omega_c = 1$ | $(\omega_{ga} = \omega_c) \leq 1$        | 3.39        | 1  | 0.0654   |
| three-ratio Great Ape + catarrhine vs. three-ratio fix $\omega_{ga} = 1$        | $\omega_{ga} \leq 1$                     | 3.75        | 1  | 0.0527   |
| three-ratio Great Ape + catarrhine vs. three-ratio fix $\omega_c = 1$           | $\omega_c \leq 1$                        | 0.13        | 1  | 0.7169   |

$\omega_0$  is the dN/dS ratio for the background branch in the model.  $\omega_{ga}$ ,  $\omega_{hu}$ , and  $\omega_c$  are the dN/dS ratios for the Great Ape OR7D4, human OR7D4, and catarrhine OR7D4 branches, respectively, when they are set as the foreground branches.  $\omega$  values in the parentheses are fixed rather than estimated. OR7D4+OR7D1 dataset with the F3x4 codon frequency model is used for this analysis. LRT, likelihood ratio test. Df, degrees of freedom. null, null hypothesis tested the likelihood ratio test. *l*, log likelihood score. 2Δ*l*, twice the difference between the log likelihood scores of the two models compared. \* P < 0.05, \*\* P < 0.01.
