# Supplementary material
Source: PubMed Central journal article supplement (PMC2795536)
Supplement: 0808378106_ST5_PDF.pdf [file 0808378106_ST5_PDF.pdf]

**Table S5. Signatures of positive selection in the primate *OR7D4/OR7D1* gene**

**A. Evidence for positive selection in the *OR7D4/OR7D1* gene using a site-specific approach**

| LRT         | 2Δl   | Df | P value | ω   | p (%) |
|-------------|-------|----|---------|-----|-------|
| OR7D4 only  |       |    |         |     |       |
| M1 vs. M2   | 6.75  | 2  | 0.0343  | 2.1 | 18    |
| M7 vs. M8   | 8.11  | 2  | 0.0174  | 2.1 | 18    |
| OR7D4+OR7D1 |       |    |         |     |       |
| M1 vs. M2   | 7.57  | 2  | 0.0227  | 2.1 | 14    |
| M7 vs. M8   | 12.05 | 2  | 0.0024  | 2.1 | 15    |

**B. Parameter estimates and positively selected sites according to different site-specific models with F3x4 model of codon frequency for the *OR7D4* only dataset**

| Model | l        | Parameters                                                                                                                                                                              | Sites with ω > 1 |          |       |              |          |               |  |
|-------|----------|-----------------------------------------------------------------------------------------------------------------------------------------------------------------------------------------|------------------|----------|-------|--------------|----------|---------------|--|
|       |          |                                                                                                                                                                                         | NEB              |          | BEB   |              |          |               |  |
| M0    | -2491.96 | ω = 0.38<br>S = 0.90<br>κ = 2.91                                                                                                                                                        | N/A              |          | N/A   |              |          | N/A           |  |
| M1    | -2469.15 | ω <sub>0</sub> = 0.07<br>ρ <sub>0</sub> = 0.64<br>(ω <sub>1</sub> = 1)<br>(ρ <sub>1</sub> = 0.36)<br>S = 0.99<br>κ = 3.08                                                               | N/A              |          | N/A   |              |          | N/A           |  |
| M2    | -2465.77 | ω <sub>0</sub> = 0.16<br>ρ <sub>0</sub> = 0.82<br>(ω <sub>1</sub> = 1)<br>ρ <sub>1</sub> = 0<br>ω <sub>2</sub> = <b>2.11</b><br>(ρ <sub>2</sub> = <b>0.18</b> )<br>S = 1.04<br>κ = 3.27 | <b>6</b> Y       | 0.999++  | 2.117 | <b>6</b> Y   | 0.879+   | 2.771 ± 1.346 |  |
|       |          |                                                                                                                                                                                         | 8 D              | 0.515    | 1.17  | 19 E         | 0.597    | 2.014 ± 1.230 |  |
|       |          |                                                                                                                                                                                         | 11 E             | 0.554    | 1.247 | <b>21</b> P  | deletion |               |  |
|       |          |                                                                                                                                                                                         | 19 E             | 0.941    | 2.002 | 22 A         | 0.626    | 2.103 ± 1.277 |  |
|       |          |                                                                                                                                                                                         | <b>21</b> P      | deletion |       | 86 D         | 0.502    | 1.752 ± 1.093 |  |
|       |          |                                                                                                                                                                                         | 22 A             | 0.948    | 2.016 | 96 G         | 0.544    | 1.867 ± 1.155 |  |
|       |          |                                                                                                                                                                                         | 26 L             | 0.778    | 1.684 | 110 L        | 0.587    | 1.960 ± 1.103 |  |
|       |          |                                                                                                                                                                                         | 86 D             | 0.906    | 1.934 | 139 R        | 0.588    | 1.959 ± 1.092 |  |
|       |          |                                                                                                                                                                                         | 87 T             | 0.548    | 1.234 | 147 M        | 0.555    | 1.898 ± 1.176 |  |
|       |          |                                                                                                                                                                                         | 88 H             | 0.9      | 1.922 | 160 V        | 0.731    | 2.378 ± 1.314 |  |
|       |          |                                                                                                                                                                                         | 96 G             | 0.924    | 1.969 | <b>170</b> L | 0.781+   | 2.521 ± 1.345 |  |
|       |          |                                                                                                                                                                                         | <b>110</b> L     | 0.982+   | 2.082 | 171 E        | 0.588    | 1.957 ± 1.107 |  |
|       |          |                                                                                                                                                                                         | <b>116</b> T     | 0.966+   | 2.051 | <b>172</b> T | deletion |               |  |
|       |          |                                                                                                                                                                                         | <b>139</b> R     | 0.983+   | 2.085 | 180 D        | 0.53     | 1.834 ± 1.150 |  |
|       |          |                                                                                                                                                                                         | 147 M            | 0.926    | 1.973 | 181 L        | 0.544    | 1.869 ± 1.161 |  |
|       |          |                                                                                                                                                                                         | 153 S            | 0.609    | 1.354 | <b>194</b> I | deletion |               |  |
|       |          |                                                                                                                                                                                         | 154 L            | 0.626    | 1.386 | 198 C        | 0.555    | 1.869 ± 1.034 |  |
|       |          |                                                                                                                                                                                         | <b>160</b> V     | 0.992++  | 2.102 | 220 K        | 0.573    | 1.953 ± 1.216 |  |
|       |          |                                                                                                                                                                                         | 164 L            | 0.897    | 1.917 | 232 A        | 0.75     | 2.431 ± 1.324 |  |
|       |          |                                                                                                                                                                                         | <b>170</b> L     | 0.995++  | 2.107 | 266 P        | 0.574    | 1.950 ± 1.200 |  |
|       |          |                                                                                                                                                                                         | <b>171</b> E     | 0.973+   | 2.065 | <b>273</b> I | 0.892+   | 2.796 ± 1.336 |  |

|       |          |                   |            |          |          |       |            |          |          |               |
|-------|----------|-------------------|------------|----------|----------|-------|------------|----------|----------|---------------|
|       |          |                   | <b>172</b> | <b>T</b> | deletion |       | <b>281</b> | <b>V</b> | deletion |               |
|       |          |                   | 179        | C        | 0.506    | 1.151 | 308        | T        | 0.536    | 1.840 ± 1.134 |
|       |          |                   | 180        | D        | 0.915    | 1.951 |            |          |          |               |
|       |          |                   | 181        | L        | 0.922    | 1.965 |            |          |          |               |
|       |          |                   | 189        | C        | 0.839    | 1.802 |            |          |          |               |
|       |          |                   | 191        | D        | 0.779    | 1.686 |            |          |          |               |
|       |          |                   | <b>194</b> | <b>I</b> | deletion |       |            |          |          |               |
|       |          |                   | <b>198</b> | <b>C</b> | 0.980+   | 2.079 |            |          |          |               |
|       |          |                   | 202        | L        | 0.898    | 1.919 |            |          |          |               |
|       |          |                   | 220        | K        | 0.93     | 1.981 |            |          |          |               |
|       |          |                   | 227        | S        | 0.897    | 1.917 |            |          |          |               |
|       |          |                   | <b>232</b> | <b>A</b> | 0.993++  | 2.105 |            |          |          |               |
|       |          |                   | 236        | K        | 0.537    | 1.213 |            |          |          |               |
|       |          |                   | 252        | Y        | 0.521    | 1.181 |            |          |          |               |
|       |          |                   | 266        | P        | 0.933    | 1.988 |            |          |          |               |
|       |          |                   | 272        | N        | 0.828    | 1.781 |            |          |          |               |
|       |          |                   | <b>273</b> | <b>I</b> | 1.000++  | 2.117 |            |          |          |               |
|       |          |                   | <b>281</b> | <b>V</b> | deletion |       |            |          |          |               |
|       |          |                   | 302        | G        | 0.6      | 1.336 |            |          |          |               |
|       |          |                   | 307        | T        | 0.512    | 1.163 |            |          |          |               |
|       |          |                   | 308        | T        | 0.922    | 1.965 |            |          |          |               |
|       |          |                   | 309        | A        | 0.811    | 1.749 |            |          |          |               |
|       |          |                   | 312        | L        | 0.512    | 1.163 |            |          |          |               |
| M3    | -2465.77 | $\omega_0 = 0.16$ | <b>6</b>   | <b>Y</b> | 0.999++  | 2.117 |            |          |          | N/A           |
| K = 2 |          | $p_0 = 0.82$      | 8          | D        | 0.515    | 1.17  |            |          |          |               |
|       |          | $\omega_1 = 2.12$ | 11         | E        | 0.554    | 1.247 |            |          |          |               |
|       |          | $(p_1 = 0.18)$    | 19         | E        | 0.941    | 2.002 |            |          |          |               |
|       |          | S = 1.04          | <b>21</b>  | <b>P</b> | deletion |       |            |          |          |               |
|       |          | $\kappa = 3.27$   | 22         | A        | 0.948    | 2.016 |            |          |          |               |
|       |          |                   | 26         | L        | 0.778    | 1.684 |            |          |          |               |
|       |          |                   | 86         | D        | 0.906    | 1.934 |            |          |          |               |
|       |          |                   | 87         | T        | 0.548    | 1.234 |            |          |          |               |
|       |          |                   | 88         | H        | 0.9      | 1.922 |            |          |          |               |
|       |          |                   | 96         | G        | 0.924    | 1.969 |            |          |          |               |
|       |          |                   | <b>110</b> | <b>L</b> | 0.982+   | 2.082 |            |          |          |               |
|       |          |                   | <b>116</b> | <b>T</b> | 0.966+   | 2.051 |            |          |          |               |
|       |          |                   | <b>139</b> | <b>R</b> | 0.983+   | 2.085 |            |          |          |               |
|       |          |                   | 147        | M        | 0.926    | 1.973 |            |          |          |               |
|       |          |                   | 153        | S        | 0.609    | 1.354 |            |          |          |               |
|       |          |                   | 154        | L        | 0.626    | 1.386 |            |          |          |               |
|       |          |                   | <b>160</b> | <b>V</b> | 0.992++  | 2.102 |            |          |          |               |
|       |          |                   | 164        | L        | 0.897    | 1.917 |            |          |          |               |
|       |          |                   | <b>170</b> | <b>L</b> | 0.995++  | 2.107 |            |          |          |               |
|       |          |                   | <b>171</b> | <b>E</b> | 0.973+   | 2.065 |            |          |          |               |
|       |          |                   | <b>172</b> | <b>T</b> | deletion |       |            |          |          |               |
|       |          |                   | 179        | C        | 0.506    | 1.151 |            |          |          |               |
|       |          |                   | 180        | D        | 0.915    | 1.951 |            |          |          |               |
|       |          |                   | 181        | L        | 0.922    | 1.965 |            |          |          |               |
|       |          |                   | 189        | C        | 0.839    | 1.802 |            |          |          |               |
|       |          |                   | 191        | D        | 0.779    | 1.686 |            |          |          |               |

**194 I** deletion  
**198 C** 0.980+ 2.079  
 202 L 0.898 1.919  
 220 K 0.93 1.981  
 227 S 0.897 1.917  
**232 A** 0.993++ 2.105  
 236 K 0.537 1.213  
 252 Y 0.521 1.181  
 266 P 0.933 1.988  
 272 N 0.828 1.781  
**273 I** 1.000++ 2.117  
**281 V** deletion  
 302 G 0.6 1.336  
 307 T 0.512 1.163  
 308 T 0.922 1.965  
 309 A 0.811 1.749  
 312 L 0.512 1.163

|    |          |                                                                                                                      |              |          |       |              |              |               |               |  |
|----|----------|----------------------------------------------------------------------------------------------------------------------|--------------|----------|-------|--------------|--------------|---------------|---------------|--|
| M7 | -2469.84 | p = 0.02<br>q = 0.03<br>S = 0.99<br>$\kappa = 3.13$                                                                  | N/A          |          |       |              | N/A          |               |               |  |
| M8 | -2465.79 | p = 19.46<br>q = 99.00<br>$\rho_0 = 0.82$<br>$\omega_1 = 2.13$<br>( $\rho_1 = 0.18$ )<br>S = 1.04<br>$\kappa = 3.27$ | <b>6 Y</b>   | 0.999++  | 2.124 | <b>6 Y</b>   | 0.958++      | 2.491 ± 1.027 |               |  |
|    |          |                                                                                                                      | 8 D          | 0.511    | 1.17  | 19 E         | 0.739        | 1.966 ± 1.106 |               |  |
|    |          |                                                                                                                      | 11 E         | 0.55     | 1.246 | <b>21 P</b>  | deletion     |               |               |  |
|    |          |                                                                                                                      | 19 E         | 0.938    | 2.003 | <b>22 A</b>  | 0.763+       | 2.032 ± 1.118 |               |  |
|    |          |                                                                                                                      | <b>21 P</b>  | deletion |       |              | 86 D         | 0.648         | 1.733 ± 1.049 |  |
|    |          |                                                                                                                      | 22 A         | 0.945    | 2.018 | 88 H         | 0.639        | 1.714 ± 1.049 |               |  |
|    |          |                                                                                                                      | 26 L         | 0.769    | 1.675 | 96 G         | 0.69         | 1.840 ± 1.079 |               |  |
|    |          |                                                                                                                      | 86 D         | 0.901    | 1.932 | <b>110 L</b> | 0.757+       | 1.987 ± 1.044 |               |  |
|    |          |                                                                                                                      | 87 T         | 0.544    | 1.233 | 116 T        | 0.665        | 1.757 ± 0.992 |               |  |
|    |          |                                                                                                                      | 88 H         | 0.895    | 1.919 | <b>139 R</b> | 0.762+       | 1.993 ± 1.037 |               |  |
|    |          |                                                                                                                      | 96 G         | 0.919    | 1.968 | 147 M        | 0.699        | 1.864 ± 1.088 |               |  |
|    |          |                                                                                                                      | <b>110 L</b> | 0.979+   | 2.085 | <b>160 V</b> | 0.867+       | 2.280 ± 1.082 |               |  |
|    |          |                                                                                                                      | <b>116 T</b> | 0.962+   | 2.051 | 164 L        | 0.635        | 1.703 ± 1.043 |               |  |
|    |          |                                                                                                                      | <b>139 R</b> | 0.981+   | 2.088 | <b>170 L</b> | 0.9+         | 2.362 ± 1.071 |               |  |
|    |          |                                                                                                                      | 147 M        | 0.922    | 1.973 | <b>171 E</b> | 0.756+       | 1.980 ± 1.048 |               |  |
|    |          |                                                                                                                      | 153 S        | 0.598    | 1.341 | <b>172 T</b> | deletion     |               |               |  |
|    |          |                                                                                                                      | 154 L        | 0.622    | 1.386 | 180 D        | 0.674        | 1.803 ± 1.077 |               |  |
|    |          |                                                                                                                      | <b>160 V</b> | 0.991++  | 2.107 | 181 L        | 0.689        | 1.839 ± 1.082 |               |  |
|    |          |                                                                                                                      | 164 L        | 0.892    | 1.915 | 189 C        | 0.537        | 1.468 ± 0.959 |               |  |
|    |          |                                                                                                                      | <b>170 L</b> | 0.994++  | 2.113 | <b>194 I</b> | deletion     |               |               |  |
|    |          |                                                                                                                      | <b>171 E</b> | 0.970+   | 2.068 | 198 C        | 0.732        | 1.911 ± 1.013 |               |  |
|    |          |                                                                                                                      | <b>172 T</b> | deletion |       |              | 202 L        | 0.589         | 1.575 ± 0.961 |  |
|    |          |                                                                                                                      | 179 C        | 0.502    | 1.151 | 220 K        | 0.714        | 1.906 ± 1.103 |               |  |
|    |          |                                                                                                                      | 180 D        | 0.91     | 1.95  | 227 S        | 0.635        | 1.704 ± 1.046 |               |  |
|    |          |                                                                                                                      | 181 L        | 0.918    | 1.965 | <b>232 A</b> | 0.882+       | 2.315 ± 1.077 |               |  |
|    |          |                                                                                                                      | 189 C        | 0.831    | 1.796 | 266 P        | 0.717        | 1.911 ± 1.097 |               |  |
|    |          |                                                                                                                      | 191 D        | 0.77     | 1.677 | 272 N        | 0.515        | 1.414 ± 0.928 |               |  |
|    |          |                                                                                                                      | <b>194 I</b> | deletion |       |              | <b>273 I</b> | 0.965++       | 2.504 ± 1.020 |  |
|    |          |                                                                                                                      | <b>198 C</b> | 0.977+   | 2.081 | <b>281 V</b> | deletion     |               |               |  |

|            |          |          |       |     |   |       |               |
|------------|----------|----------|-------|-----|---|-------|---------------|
| 202        | L        | 0.893    | 1.916 | 308 | T | 0.683 | 1.820 ± 1.070 |
| 220        | K        | 0.926    | 1.981 | 309 | A | 0.511 | 1.413 ± 0.946 |
| 227        | S        | 0.892    | 1.915 |     |   |       |               |
| <b>232</b> | <b>A</b> | 0.992++  | 2.11  |     |   |       |               |
| 236        | K        | 0.533    | 1.213 |     |   |       |               |
| 252        | Y        | 0.517    | 1.181 |     |   |       |               |
| 266        | P        | 0.93     | 1.988 |     |   |       |               |
| 272        | N        | 0.82     | 1.774 |     |   |       |               |
| <b>273</b> | <b>I</b> | 1.000++  | 2.124 |     |   |       |               |
| <b>281</b> | <b>V</b> | deletion |       |     |   |       |               |
| 302        | G        | 0.596    | 1.335 |     |   |       |               |
| 307        | T        | 0.508    | 1.162 |     |   |       |               |
| 308        | T        | 0.917    | 1.964 |     |   |       |               |
| 309        | A        | 0.803    | 1.742 |     |   |       |               |
| 312        | L        | 0.508    | 1.163 |     |   |       |               |

**C. Parameter estimates and positively selected sites according to different site-specific models with F3x4 model of codon frequency for the OR7D4+OR7D1 dataset**

| model | l        | parameters                                                                                                                                                                                 | Sites with $\omega > 1$ |       |                       |               |  |  |
|-------|----------|--------------------------------------------------------------------------------------------------------------------------------------------------------------------------------------------|-------------------------|-------|-----------------------|---------------|--|--|
|       |          |                                                                                                                                                                                            | NEB                     |       |                       | BEB           |  |  |
| M0    | -2861.29 | $\omega = 0.35$<br>S = 1.10<br>$\kappa = 3.12$                                                                                                                                             | N/A                     |       |                       | N/A           |  |  |
| M1    | -2835.72 | $\omega_0 = 0.11$<br>$\rho_0 = 0.71$<br>( $\omega_1 = 1$ )<br>( $\rho_1 = 0.29$ )<br>S = 1.20<br>$\kappa = 3.26$                                                                           | N/A                     |       |                       | N/A           |  |  |
| M2    | -2831.94 | $\omega_0 = 0.18$<br>$\rho_0 = 0.85$<br>( $\omega_1 = 1$ )<br>$\rho_1 = 0.01$<br><b><math>\omega_2 = 2.07</math></b><br><b>(<math>\rho_2 = 0.14</math>)</b><br>S = 1.25<br>$\kappa = 3.43$ | <b>6</b> Y 0.987+       | 2.053 | <b>6</b> Y 0.827+     | 2.563 ± 1.188 |  |  |
|       |          |                                                                                                                                                                                            | <b>21</b> P deletion    |       | <b>21</b> P deletion  |               |  |  |
|       |          |                                                                                                                                                                                            | 19 E 0.824              | 1.765 | 22 A 0.534            | 1.851 ± 1.176 |  |  |
|       |          |                                                                                                                                                                                            | 22 A 0.872              | 1.851 | 88 H 0.537            | 1.850 ± 1.142 |  |  |
|       |          |                                                                                                                                                                                            | 86 D 0.781              | 1.686 | <b>139</b> R 0.804+   | 2.500 ± 1.185 |  |  |
|       |          |                                                                                                                                                                                            | 88 H 0.892              | 1.887 | 160 V 0.608           | 2.030 ± 1.143 |  |  |
|       |          |                                                                                                                                                                                            | 96 G 0.808              | 1.736 | 170 L 0.719           | 2.313 ± 1.209 |  |  |
|       |          |                                                                                                                                                                                            | 110 L 0.887             | 1.891 | <b>172</b> T deletion |               |  |  |
|       |          |                                                                                                                                                                                            | 112 N 0.814             | 1.747 | <b>194</b> I deletion |               |  |  |
|       |          |                                                                                                                                                                                            | 116 T 0.867             | 1.857 | 227 S 0.671           | 2.192 ± 1.190 |  |  |
|       |          |                                                                                                                                                                                            | 131 H 0.619             | 1.389 | <b>232</b> A 0.828+   | 2.567 ± 1.190 |  |  |
|       |          |                                                                                                                                                                                            | <b>139</b> R 0.986+     | 2.052 | 252 Y 0.724           | 2.327 ± 1.213 |  |  |
|       |          |                                                                                                                                                                                            | 147 M 0.822             | 1.761 | <b>273</b> I 0.914+   | 2.749 ± 1.134 |  |  |
|       |          |                                                                                                                                                                                            | <b>160</b> V 0.951+     | 1.996 | <b>281</b> V deletion |               |  |  |
|       |          |                                                                                                                                                                                            | 164 L 0.75              | 1.631 |                       |               |  |  |
|       |          |                                                                                                                                                                                            | <b>170</b> L 0.969+     | 2.024 |                       |               |  |  |
|       |          |                                                                                                                                                                                            | 171 E 0.889             | 1.888 |                       |               |  |  |
|       |          |                                                                                                                                                                                            | <b>172</b> T deletion   |       |                       |               |  |  |

|       |          |                     |            |          |          |       |     |
|-------|----------|---------------------|------------|----------|----------|-------|-----|
|       |          |                     | 180        | D        | 0.808    | 1.735 |     |
|       |          |                     | 181        | L        | 0.791    | 1.705 |     |
|       |          |                     | 189        | C        | 0.922    | 1.949 |     |
|       |          |                     | 191        | D        | 0.697    | 1.533 |     |
|       |          |                     | <b>194</b> | <b>I</b> | deletion |       |     |
|       |          |                     | 198        | C        | 0.876    | 1.874 |     |
|       |          |                     | 202        | L        | 0.667    | 1.482 |     |
|       |          |                     | 220        | K        | 0.826    | 1.768 |     |
|       |          |                     | <b>227</b> | <b>S</b> | 0.962+   | 2.013 |     |
|       |          |                     | <b>232</b> | <b>A</b> | 0.987+   | 2.053 |     |
|       |          |                     | <b>252</b> | <b>Y</b> | 0.969+   | 2.025 |     |
|       |          |                     | 266        | P        | 0.835    | 1.785 |     |
|       |          |                     | 272        | N        | 0.557    | 1.275 |     |
|       |          |                     | <b>273</b> | <b>I</b> | 0.994++  | 2.062 |     |
|       |          |                     | <b>281</b> | <b>V</b> | deletion |       |     |
|       |          |                     | 308        | T        | 0.816    | 1.75  |     |
|       |          |                     | 312        | L        | 0.509    | 1.169 |     |
| M3    | -2831.94 | $\omega_0 = 0.17$   | <b>6</b>   | <b>Y</b> | 0.997++  | 2.05  | N/A |
| K = 3 |          | $\rho_0 = 0.71$     | 19         | E        | 0.844    | 1.766 |     |
|       |          | $\omega_1 = 0.28$   | <b>21</b>  | <b>P</b> | deletion |       |     |
|       |          | ( $\rho_1 = 0.14$ ) | 22         | A        | 0.89     | 1.852 |     |
|       |          | $\omega_2 = 2.05$   | 86         | D        | 0.801    | 1.687 |     |
|       |          | ( $\rho_2 = 0.15$ ) | 88         | H        | 0.911    | 1.889 |     |
|       |          | S = 1.25            | 96         | G        | 0.828    | 1.737 |     |
|       |          | $\kappa = 3.43$     | 110        | L        | 0.916    | 1.899 |     |
|       |          |                     | 112        | N        | 0.834    | 1.748 |     |
|       |          |                     | 116        | T        | 0.896    | 1.864 |     |
|       |          |                     | 131        | H        | 0.638    | 1.385 |     |
|       |          |                     | <b>139</b> | <b>R</b> | 0.997++  | 2.049 |     |
|       |          |                     | 147        | M        | 0.842    | 1.762 |     |
|       |          |                     | <b>160</b> | <b>V</b> | 0.970+   | 2     |     |
|       |          |                     | 164        | L        | 0.771    | 1.631 |     |
|       |          |                     | <b>170</b> | <b>L</b> | 0.984+   | 2.025 |     |
|       |          |                     | 171        | E        | 0.913    | 1.894 |     |
|       |          |                     | <b>172</b> | <b>T</b> | deletion |       |     |
|       |          |                     | 180        | D        | 0.828    | 1.736 |     |
|       |          |                     | 181        | L        | 0.811    | 1.705 |     |
|       |          |                     | 189        | C        | 0.947    | 1.957 |     |
|       |          |                     | 191        | D        | 0.717    | 1.531 |     |
|       |          |                     | <b>194</b> | <b>I</b> | deletion |       |     |
|       |          |                     | 198        | C        | 0.906    | 1.883 |     |
|       |          |                     | 202        | L        | 0.69     | 1.481 |     |
|       |          |                     | 220        | K        | 0.846    | 1.769 |     |
|       |          |                     | <b>227</b> | <b>S</b> | 0.979+   | 2.015 |     |
|       |          |                     | <b>232</b> | <b>A</b> | 0.997++  | 2.05  |     |
|       |          |                     | <b>252</b> | <b>Y</b> | 0.984+   | 2.025 |     |
|       |          |                     | 266        | P        | 0.855    | 1.786 |     |
|       |          |                     | 272        | N        | 0.576    | 1.269 |     |
|       |          |                     | <b>273</b> | <b>I</b> | 1.000++  | 2.054 |     |
|       |          |                     | <b>281</b> | <b>V</b> | deletion |       |     |

|    |          |                                                                                                                                            |            |          |          |       |            |          |                       |
|----|----------|--------------------------------------------------------------------------------------------------------------------------------------------|------------|----------|----------|-------|------------|----------|-----------------------|
|    |          |                                                                                                                                            | 308        | T        | 0.836    | 1.751 |            |          |                       |
|    |          |                                                                                                                                            | 309        | A        | 0.505    | 1.139 |            |          |                       |
|    |          |                                                                                                                                            | 312        | L        | 0.523    | 1.169 |            |          |                       |
| M7 | -2837.96 | p = 0.21<br>q = 0.35<br>S = 1.19<br>κ = 3.28                                                                                               |            |          | N/A      |       |            |          | N/A                   |
| M8 | -2831.94 | p = 15.54<br>q = 68.17<br>ρ <sub>0</sub> = 0.85<br>ω <sub>1</sub> = <b>2.05</b><br>( <b>ρ<sub>1</sub> = 0.15</b> )<br>S = 1.25<br>κ = 3.43 | <b>6</b>   | <b>Y</b> | 0.998++  | 2.048 | <b>6</b>   | <b>Y</b> | 0.903+ 2.841 ± 1.128  |
|    |          |                                                                                                                                            | 19         | E        | 0.846    | 1.766 | <b>21</b>  | <b>P</b> | deletion              |
|    |          |                                                                                                                                            | <b>21</b>  | <b>P</b> | deletion |       | 22         | A        | 0.541 1.899 ± 1.366   |
|    |          |                                                                                                                                            | 22         | A        | 0.892    | 1.851 | 88         | H        | 0.55 1.913 ± 1.348    |
|    |          |                                                                                                                                            | 86         | D        | 0.803    | 1.688 | <b>139</b> | <b>R</b> | 0.888+ 2.799 ± 1.149  |
|    |          |                                                                                                                                            | 88         | H        | 0.912    | 1.889 | 160        | V        | 0.658 2.202 ± 1.334   |
|    |          |                                                                                                                                            | 96         | G        | 0.83     | 1.737 | <b>170</b> | <b>L</b> | 0.788+ 2.556 ± 1.278  |
|    |          |                                                                                                                                            | 110        | L        | 0.918    | 1.901 | <b>172</b> | <b>T</b> | deletion              |
|    |          |                                                                                                                                            | 112        | N        | 0.836    | 1.748 | <b>194</b> | <b>I</b> | deletion              |
|    |          |                                                                                                                                            | 116        | T        | 0.899    | 1.866 | 227        | S        | 0.735 2.414 ± 1.314   |
|    |          |                                                                                                                                            | 131        | H        | 0.64     | 1.385 | <b>232</b> | <b>A</b> | 0.904+ 2.842 ± 1.128  |
|    |          |                                                                                                                                            | <b>139</b> | <b>R</b> | 0.998++  | 2.047 | <b>252</b> | <b>Y</b> | 0.793+ 2.569 ± 1.275  |
|    |          |                                                                                                                                            | 147        | M        | 0.843    | 1.762 | <b>273</b> | <b>I</b> | 0.967++ 2.985 ± 1.010 |
|    |          |                                                                                                                                            | <b>160</b> | <b>V</b> | 0.971+   | 1.999 | <b>281</b> | <b>V</b> | deletion              |
|    |          |                                                                                                                                            | 164        | L        | 0.773    | 1.631 |            |          |                       |
|    |          |                                                                                                                                            | <b>170</b> | <b>L</b> | 0.985+   | 2.024 |            |          |                       |
|    |          |                                                                                                                                            | 171        | E        | 0.915    | 1.895 |            |          |                       |
|    |          |                                                                                                                                            | <b>172</b> | <b>T</b> | deletion |       |            |          |                       |
|    |          |                                                                                                                                            | 180        | D        | 0.83     | 1.736 |            |          |                       |
|    |          |                                                                                                                                            | 181        | L        | 0.813    | 1.706 |            |          |                       |
|    |          |                                                                                                                                            | 189        | C        | 0.949    | 1.957 |            |          |                       |
|    |          |                                                                                                                                            | 191        | D        | 0.719    | 1.532 |            |          |                       |
|    |          |                                                                                                                                            | <b>194</b> | <b>I</b> | deletion |       |            |          |                       |
|    |          |                                                                                                                                            | 198        | C        | 0.909    | 1.885 |            |          |                       |
|    |          |                                                                                                                                            | 202        | L        | 0.693    | 1.483 |            |          |                       |
|    |          |                                                                                                                                            | 220        | K        | 0.847    | 1.769 |            |          |                       |
|    |          |                                                                                                                                            | <b>227</b> | <b>S</b> | 0.980+   | 2.014 |            |          |                       |
|    |          |                                                                                                                                            | <b>232</b> | <b>A</b> | 0.998++  | 2.048 |            |          |                       |
|    |          |                                                                                                                                            | <b>252</b> | <b>Y</b> | 0.985+   | 2.024 |            |          |                       |
|    |          |                                                                                                                                            | 266        | P        | 0.857    | 1.786 |            |          |                       |
|    |          |                                                                                                                                            | 272        | N        | 0.578    | 1.27  |            |          |                       |
|    |          |                                                                                                                                            | <b>273</b> | <b>I</b> | 1.000++  | 2.052 |            |          |                       |
|    |          |                                                                                                                                            | <b>281</b> | <b>V</b> | deletion |       |            |          |                       |
|    |          |                                                                                                                                            | 308        | T        | 0.838    | 1.752 |            |          |                       |
|    |          |                                                                                                                                            | 309        | A        | 0.507    | 1.139 |            |          |                       |
|    |          |                                                                                                                                            | 312        | L        | 0.525    | 1.169 |            |          |                       |

Site-specific likelihood analysis is used to determine whether any codon positions are associated with  $\omega > 1$ , consistent with positive Darwinian selection. Two datasets, OR7D4 only and OR7D4+OR7D1, are used. In A), nested neutral models, M1 and M7, are compared to selection models, M2 and M8, respectively. P values are computed using  $2\Delta l$  as a chi-square value. Significant P values are seen in all tests for positive selection in both datasets. dN/dS ( $\omega$ ) of the

positively-selected site class and proportion of sites ( $p$ ) with the dN/dS ratio for positive selection are listed. The F3x4 codon frequency model was used. In B) and C), complete site-specific likelihood analysis with detailed parameter estimates are shown for site-specific models using the B) OR7D4 only and C) OR7D4+OR7D1 datasets. Sites predicted to be under positive selection ( $\omega > 1$ ) using NEB and BEB under different site-specific models were shown with a posterior probability and predicted  $\omega$  (or  $\omega \pm$  S.E.M. for BEB). LRT, likelihood ratio test.  $2\Delta l$ , twice the difference between the log likelihood scores of the two models compared. Df, degrees of freedom. NEB, naïve empirical Bayes. BEB, Bayes empirical Bayes.  $l$ , log likelihood score.  $p$ , proportion of sites with the corresponding  $\omega$ .  $S$ , tree length.  $\kappa$ , transition-transversion rate ratio.  $p$  and  $q$  are parameters of beta-distribution used in M7 and M8.  $\omega$  and  $p$  values in the parentheses are fixed rather than estimated. For NEB, + posterior probability  $> 0.95$ , ++ posterior probability  $> 0.99$ . For BEB, + posterior probability  $> 0.75$ , ++ posterior probability  $> 0.95$ .
